# Supplementary figures and images for: Crosstalk between arterial components and bioresorbable, 3-D printed poly-l-lactic acid scaffolds
Source: Royal Society of Chemistry journal article supplement (doi:10.1039/d2bm00732k), 2022-01-01

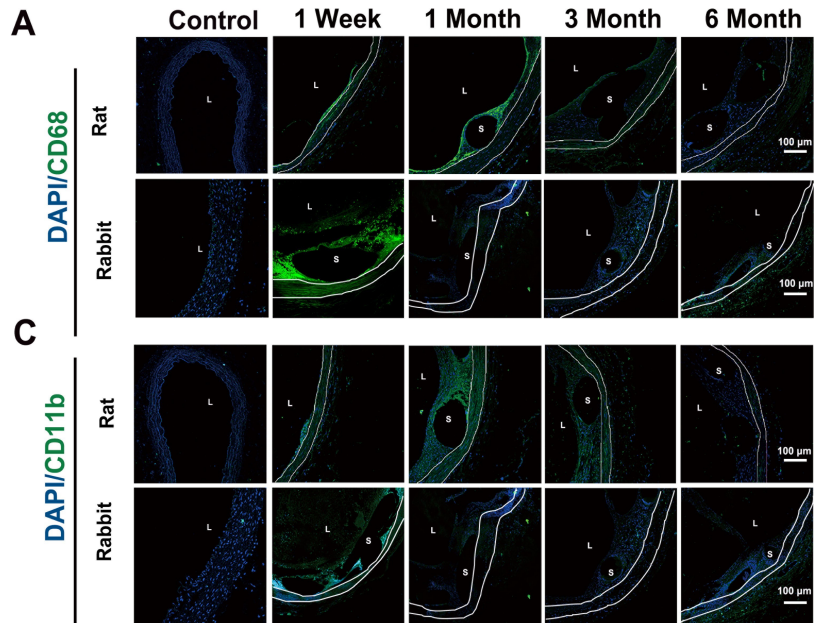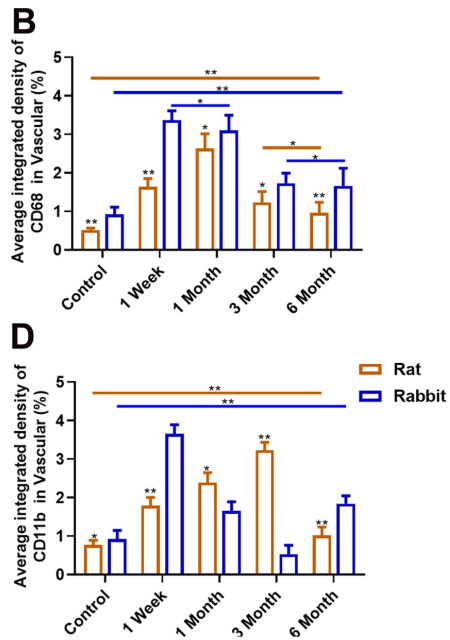

Supplement: d2bm00732k5.pdf [file d2bm00732k5.pdf]
